# Supplementary material for: Novel genes associated with lymph node metastasis in triple negative breast cancer
Source: PubMed Central journal article supplement (PMC4633580; doi:10.1038/srep15832), 2015-11-05
Supplement: srep15832-s1.pdf [file srep15832-s1.pdf]

## Novel genes associated with lymph node metastasis in triple negative breast cancer.

Journal: *Scientific Reports*

Andrea Mathe<sup>a,b</sup>, Michelle Wong-Brown<sup>a,b</sup>, Brianna Morten<sup>a,b</sup>, John F. Forbes<sup>b,c</sup>, Stephen G. Braye<sup>d</sup>, Kelly A. Avery-Kiejda<sup>a,b,†</sup> and Rodney J. Scott<sup>a,b,d,†\*</sup>.

1. Centre for Information Based Medicine, Hunter Medical Research Institute, NSW, Australia, 2305
2. Priority Research Centre for Cancer, School of Biomedical Sciences and Pharmacy, Faculty of Health, University of Newcastle, NSW, Australia, 2308.
3. Dept. of Surgical Oncology, Calvary Mater Newcastle Hospital; Australian New Zealand Breast Cancer Trials Group; and School of Medicine and Public Health, University of Newcastle, NSW, Australia, 2308.
4. Hunter Area Pathology Service, John Hunter Hospital, Newcastle, NSW, Australia, 2305.

† These authors contributed equally

\* Corresponding author

**Supplementary Table 1:** Clinical information of samples in the study cohort

| patient identifier | Tissue sample | LN status | Age at diagnosis | grade | LN status at 1 <sup>st</sup> surgery |
|--------------------|---------------|-----------|------------------|-------|--------------------------------------|
| 1                  | IDC           | IDC LN-   | 73               | 3     | 0/1                                  |
| 2                  | IDC           | IDC LN-   | 57               | 3     | No lymph nodes found                 |
| 3                  | IDC           | IDC LN+   | 45               | 3     | 1/1                                  |
|                    | NAT           | NAT LN+   |                  |       |                                      |
| 4                  | IDC           | IDC LN+   | 64               | 3     | 1/3                                  |
|                    | LN            | LN        |                  |       |                                      |
| 5                  | IDC           | IDC LN+   | 56               | 3     | 9/22                                 |
|                    | LN            | LN        |                  |       |                                      |
|                    | NAT           | NAT LN+   |                  |       |                                      |
| 6                  | IDC           | IDC LN+   | 48               | 3     | 1/3                                  |
|                    | NAT           | NAT LN+   |                  |       |                                      |
| 7                  | IDC           | IDC LN+   | 40               | 3     | 1/2                                  |
|                    | LN            | LN        |                  |       |                                      |
|                    | NAT           | NAT LN+   |                  |       |                                      |
| 8                  | IDC           | IDC LN+   | 50               | 3     | 1/2                                  |
|                    | NAT           | NAT LN+   |                  |       |                                      |
| 9                  | IDC           | IDC LN+   | 47               | 3     | 4/13                                 |
|                    | LN            | LN        |                  |       |                                      |
|                    | NAT           | NAT LN+   |                  |       |                                      |
| 10                 | IDC           | IDC LN-   | 48               | 3     | 0/4                                  |
|                    | NAT           | NAT LN-   |                  |       |                                      |
| 11                 | IDC           | IDC LN+   | 28               | 3     | 4/12                                 |
|                    | LN            | LN        |                  |       |                                      |
|                    | NAT           | NAT LN+   |                  |       |                                      |

|    |     |         |    |   |       |
|----|-----|---------|----|---|-------|
| 12 | IDC | IDC LN- | 44 | 3 | 0/1   |
|    | NAT | NAT LN- |    |   |       |
| 13 | IDC | IDC LN- | 59 | 3 | 0/3   |
| 14 | IDC | IDC LN+ | 55 | 3 | 23/25 |
|    | LN  | LN      |    |   |       |
| 15 | IDC | IDC LN- | 52 | 3 | 0/23  |
| 16 | IDC | IDC LN+ | 78 | 3 | 16/19 |
|    | LN  | LN      |    |   |       |
| 17 | IDC | IDC LN- | 52 | 3 | 0/2   |
| 18 | IDC | IDC LN+ | 47 | 3 | 1/14  |
|    | LN  | LN      |    |   |       |
|    | NAT | NAT LN+ |    |   |       |
| 19 | IDC | IDC LN- | 50 | 3 | 0/19  |
|    | NAT | NAT LN- |    |   |       |
| 20 | IDC | IDC LN+ | 42 | 3 | 1/9   |
|    | LN  | LN      |    |   |       |
| 21 | IDC | IDC LN- | 84 | 3 | 0/4   |
| 22 | IDC | IDC LN- | 45 | 3 | 0/4   |
| 23 | IDC | IDC LN- | 61 | 3 | 0/12  |
|    | NAT | NAT LN- |    |   |       |
| 24 | IDC | IDC LN- | 51 | 3 | 0/3   |
| 25 | IDC | IDC LN+ | 66 | 3 | 1/23  |
|    | LN  | LN      |    |   |       |
| 26 | IDC | IDC LN- | 36 | 3 | 0/1   |
|    | NAT | NAT LN- |    |   |       |
| 27 | IDC | IDC LN- | 73 | 3 | 0/1   |
| 28 | IDC | IDC LN+ | 42 | 3 | 1/15  |
|    | NAT | NAT LN+ |    |   |       |
| 29 | IDC | IDC LN- | 69 | 3 | 0/15  |
| 30 | IDC | IDC LN+ | 39 | 3 | 1/17  |
|    | LN  | LN      |    |   |       |
|    | NAT | NAT LN+ |    |   |       |
| 31 | LN  | LN      | 78 | 3 | 2/18  |
| 32 | IDC | IDC LN+ | 65 | 3 | 5/26  |
|    | LN  | LN      |    |   |       |
|    | NAT | NAT LN+ |    |   |       |
| 33 | IDC | IDC LN+ | 55 | 3 | 1/17  |
|    | LN  | LN      |    |   |       |
|    | NAT | NAT LN+ |    |   |       |
| 34 | IDC | IDC LN- | 80 | 3 | 0/8   |
| 35 | LN  | LN      | 72 | 3 | 2/17  |

**Supplementary Table 2:** 185 significantly altered genes from IDC versus NAT comparison with 99 validated genes from our second cohort, as well as the 95 validated genes from the TCGA cohort. The 66 genes that are significantly different in all three cohorts are shown in bold. 28 genes are highlighted with \* are TNBC specific genes validated in our second cohort, 14 genes highlighted with ^ are TNBC specific genes validated in the TCGA cohort. NS = “not significant” in the validation/TCGA cohort; NOA = “Not on Array” that was used for validation/TCGA cohort.

| Gene type                  | Transcript ID      | Study cohort             |                      | Validation cohort         |                      | TCGA cohort               |                      |
|----------------------------|--------------------|--------------------------|----------------------|---------------------------|----------------------|---------------------------|----------------------|
|                            |                    | Fold-Change(IDC vs. NAT) | p-value(IDC vs. NAT) | Fold-Change (IDC vs. NAT) | p-value(IDC vs. NAT) | Fold-Change (IDC vs. NAT) | p-value(IDC vs. NAT) |
| Protein coding transcripts | AADACL2            | -2.06                    | 3.20E-06             | -4.76                     | 1.76E-10             |                           | NS                   |
|                            | <b>ABCA10</b>      | -2.71                    | 5.51E-10             | -4.69                     | 1.76E-09             | -3.07                     | 3.59E-21             |
|                            | <b>ABCA6</b>       | -3.83                    | 4.95E-10             | -5.01                     | 6.37E-06             | -8.96                     | 5.42E-23             |
|                            | <b>ABCA8</b>       | -2.58                    | 6.91E-10             | -5.41                     | 7.23E-05             | -20.18                    | 5.12E-29             |
|                            | <b>ABCA9</b>       | -2.54                    | 4.50E-08             | -4.55                     | 2.43E-06             | -15.16                    | 2.85E-35             |
|                            | <b>ABI3BP</b>      | -4.32                    | 9.39E-10             |                           | NS                   | -2.94                     | 7.05E-14             |
|                            | ADH1B *            | -2.47                    | 1.42E-06             | -3.88                     | 0.005398             |                           | NOA                  |
|                            | <b>AGR2 *</b>      | -2.1                     | 3.56E-06             | -20.16                    | 3.97E-05             | -13.79                    | 5.62E-49             |
|                            | AGR3 *             | -3.01                    | 8.72E-12             | -34.24                    | 1.48E-15             |                           | NOA                  |
|                            | AMD1               | 2.32                     | 3.92E-04             |                           | NS                   |                           | NS                   |
|                            | <b>ANKRD30A *^</b> | -4.91                    | 9.08E-12             | -43.09                    | 5.71E-12             | -31.96                    | 1.48E-25             |
|                            | <b>ANKRD30B *</b>  | -2.24                    | 4.58E-04             | -13.74                    | 0.000141             | -11.36                    | 1.11E-17             |
|                            | ANKRD36BP1 *       | 2.07                     | 8.39E-04             | 3.44                      | 0.000109             |                           | NOA                  |
|                            | <b>ANLN</b>        | 2.56                     | 9.26E-06             | 15.88                     | 2.62E-08             | 8.94                      | 2.52E-56             |
|                            | <b>ANP32E *^</b>   | 2.05                     | 9.32E-04             | 2.58                      | 2.37E-06             | 3.06                      | 5.47E-40             |
|                            | <b>APOD *</b>      | -7.77                    | 9.23E-09             | -4.71                     | 0.002126             | -5.16                     | 1.65E-16             |
|                            | <b>AREG *</b>      | -2.06                    | 2.80E-06             | -7.97                     | 0.000308             | -16.35                    | 1.54E-12             |
|                            | <b>ASPM</b>        | 2.97                     | 4.08E-07             | 15.69                     | 5.15E-08             | 19.80                     | 2.17E-71             |
|                            | <b>ATAD2</b>       | 2.63                     | 2.13E-06             | 2.93                      | 0.002838             | 3.95                      | 3.05E-32             |
|                            | <b>BGN</b>         | 2.48                     | 1.21E-05             | 8.53                      | 1.04E-05             | 3.38                      | 1.20E-42             |
|                            | C21orf91 ^         | 2.05                     | 4.29E-05             |                           | NS                   | 2.18                      | 6.56E-37             |
|                            | C3orf62            | -2.02                    | 4.69E-06             |                           | NS                   |                           | NS                   |
|                            | <b>CALU</b>        | 2.19                     | 3.88E-06             | 2.86                      | 3.88E-08             | 3.26                      | 1.72E-27             |
|                            | CCDC90A            | 2.11                     | 1.89E-04             |                           | NS                   |                           | NOA                  |
|                            | CCL28              | -2.14                    | 9.17E-05             | -7.42                     | 0.003923             |                           | NS                   |
|                            | CCNA2              | 2.55                     | 1.79E-06             | 5.72                      | 3.44E-06             |                           | NOA                  |
|                            | <b>CCT3</b>        | 2.09                     | 3.04E-06             | 2.39                      | 1.16E-07             | 2.46                      | 2.70E-42             |
|                            | CD24 *             | 3.24                     | 1.45E-05             | 1.94                      | 0.003934             |                           | NS                   |
|                            | CD34               | -2.07                    | 1.14E-06             |                           | NS                   |                           | NS                   |
|                            | CD36               | -2.48                    | 4.12E-07             |                           | NS                   | -12.09                    | 4.36E-20             |
| <b>CENPF</b>               | 2.94               | 6.16E-08                 | 14.06                | 1.36E-08                  | 18.38                | 9.29E-69                  |                      |

|                   |       |          |       |          |        |           |
|-------------------|-------|----------|-------|----------|--------|-----------|
| <b>CHML</b>       | 2.12  | 2.98E-05 | 3.72  | 1.11E-05 | 2.58   | 1.22E-19  |
| CHRD1             | -2.21 | 3.71E-07 |       | NS       | -3.14  | 1.96E-28  |
| <b>CKS2</b>       | 4.2   | 6.45E-08 | 4.93  | 2.83E-05 | 5.13   | 3.45E-56  |
| CLEC3B            | -3.25 | 9.91E-11 |       | NS       | -7.34  | 1.12E-46  |
| CLEC7A            | 2.5   | 3.82E-06 |       | NS       | 4.93   | 3.13E-17  |
| COL10A1           | 4.44  | 1.50E-07 |       | NS       | 29.09  | 1.78E-109 |
| <b>COL14A1 *</b>  | -3.44 | 5.00E-09 | -3.01 | 0.000568 | -5.57  | 4.10E-14  |
| CPE               | -2.74 | 6.18E-09 |       | NS       | -7.20  | 7.49E-31  |
| <b>CXCL10</b>     | 4.48  | 1.19E-05 | 24.83 | 6.19E-06 | 3.09   | 8.20E-33  |
| <b>CXCL11</b>     | 2.03  | 6.14E-05 | 11.91 | 0.000101 | 9.68   | 9.14E-31  |
| CXCL12            | -2.6  | 8.37E-09 |       | NS       | -2.69  | 6.40E-16  |
| <b>CXCL9</b>      | 5.14  | 1.96E-05 | 6.31  | 0.005079 | 3.20   | 6.32E-17  |
| DCLK1             | -2.46 | 1.27E-08 |       | NS       |        | NOA       |
| DCN               | -3.29 | 8.40E-10 |       | NS       | -5.58  | 1.40E-17  |
| DEK ^             | 2.01  | 2.76E-04 |       | NS       | 1.82   | 8.99E-21  |
| DNAPTP3           | 6.06  | 2.17E-07 | 3.35  | 1.32E-05 |        | NOA       |
| <b>DSC2 *^</b>    | 2.38  | 9.00E-04 | 1.89  | 0.006364 | 5.31   | 1.63E-29  |
| <b>ECT2</b>       | 2.52  | 4.48E-07 | 3.38  | 0.000117 | 4.47   | 2.82E-34  |
| EFEMP1            | -2.13 | 2.58E-04 |       | NS       | -3.68  | 2.05E-17  |
| <b>EGR1</b>       | -3.08 | 9.70E-07 | -4.73 | 5.73E-05 | -12.87 | 8.24E-38  |
| ESRP1             | 2.23  | 8.75E-06 |       | NS       |        | NOA       |
| FABP4             | -3.61 | 8.74E-07 |       | NS       | -13.40 | 4.04E-15  |
| <b>FGF10 *</b>    | -2.34 | 7.78E-11 | -3.04 | 3.45E-05 | -10.16 | 5.14E-16  |
| FGF7              | -2.53 | 1.47E-04 |       | NS       | -3.67  | 4.15E-15  |
| <b>FN1</b>        | 3.94  | 1.26E-06 | 7.9   | 2.21E-12 | 4.73   | 3.88E-48  |
| <b>FREM1</b>      | -2.18 | 9.51E-09 | -2.37 | 7.86E-06 | -13.48 | 2.05E-36  |
| GFPT1 ^           | 2.03  | 1.74E-04 |       | NS       | 1.93   | 3.51E-11  |
| <b>GPI ^</b>      | 2.23  | 9.43E-06 | 3.66  | 0.000226 | 1.87   | 3.91E-09  |
| HBA1              | -2.09 | 3.65E-05 |       | NS       | -3.92  | 1.33E-44  |
| HBA2              | -2.37 | 4.60E-06 |       | NOA      | -5.71  | 1.45E-43  |
| HIST1H2AE         | 2.42  | 3.06E-05 |       | NOA      | 2.43   | 4.63E-20  |
| HIST1H2AI *       | 2.24  | 7.53E-05 | 2     | 0.000112 |        | NOA       |
| <b>HIST1H2BD</b>  | 2.47  | 5.20E-04 | 2.3   | 0.004617 | 2.60   | 1.71E-32  |
| HIST1H2BG         | 3.78  | 4.34E-05 |       | NOA      | 2.71   | 1.67E-22  |
| HIST1H2BM         | 2.12  | 4.21E-04 |       | NS       | 2.04   | 1.69E-22  |
| <b>HIST1H3F *</b> | 4.64  | 8.42E-07 | 1.61  | 0.002149 | 2.65   | 1.06E-38  |
| HIST1H3I          | 3.15  | 2.38E-06 |       | NS       |        | NS        |
| HIST1H4L *        | 2.17  | 1.25E-03 | 1.75  | 0.006481 |        | NS        |
| HIST2H2AB         | 3.13  | 2.90E-06 |       | NS       | 3.11   | 2.89E-36  |
| HORMAD1 ^         | 3.28  | 4.46E-06 |       | NS       | 20.62  | 3.09E-54  |
| HSPB6             | -3.93 | 6.45E-12 |       | NS       | -2.07  | 2.13E-35  |

|                 |       |          |        |          |        |          |
|-----------------|-------|----------|--------|----------|--------|----------|
| <b>IGF1 *</b>   | -2.96 | 1.21E-08 | -3.65  | 0.000782 | -5.83  | 1.42E-18 |
| IGHA2           | -5.39 | 1.52E-07 |        | NOA      |        | NOA      |
| IGJ             | -4.48 | 4.62E-06 |        | NS       |        | NS       |
| <b>IL6ST *^</b> | -2.36 | 7.53E-06 | -3.39  | 8.60E-08 | -3.20  | 1.92E-23 |
| <b>INHBA</b>    | 2.12  | 3.42E-06 | 7.48   | 1.49E-06 | 5.23   | 3.52E-60 |
| <b>JAM2</b>     | -2.08 | 6.94E-08 | -2.47  | 0.001    | -4.20  | 2.88E-29 |
| <b>KIF11</b>    | 2.4   | 1.92E-06 | 8.69   | 1.39E-05 | 6.69   | 6.47E-60 |
| <b>KPNA2</b>    | 2.16  | 9.43E-05 | 5.28   | 4.32E-08 | 3.72   | 6.80E-37 |
| <b>LAMA2 *</b>  | -2.02 | 7.43E-07 | -2.51  | 0.001598 | -4.28  | 4.96E-14 |
| LEP             | -2.53 | 1.77E-06 |        | NS       |        | NS       |
| <b>LIFR</b>     | -2.67 | 3.25E-07 | -5.28  | 0.000688 | -7.78  | 1.84E-43 |
| LRRC15          | 2.04  | 1.22E-04 |        | NS       | 3.12   | 2.02E-33 |
| MAL2            | 2.19  | 1.31E-06 |        | NS       |        | NS       |
| <b>MELK</b>     | 2.13  | 2.71E-05 | 14.49  | 1.27E-07 | 14.34  | 1.72E-61 |
| <b>MKI67</b>    | 2.18  | 9.96E-06 | 10.94  | 5.24E-08 | 14.02  | 1.35E-51 |
| <b>MME</b>      | -2.08 | 6.00E-05 | -5.17  | 0.001052 | -8.64  | 6.89E-40 |
| MUCL1           | -3.17 | 1.34E-03 | -16.47 | 0.000281 |        | NOA      |
| <b>MYBL1 *</b>  | 2.24  | 7.28E-04 | 4.34   | 0.005912 | 5.34   | 8.72E-17 |
| MYH11           | -2.59 | 1.38E-07 | -4.97  | 9.52E-08 |        | NS       |
| NDC80           | 2.42  | 8.30E-07 |        | NOA      |        | NOA      |
| <b>NUSAP1</b>   | 2.14  | 7.03E-07 | 8.42   | 1.55E-06 | 6.35   | 3.64E-46 |
| <b>OGN *</b>    | -4.13 | 7.52E-11 | -5.26  | 5.37E-05 | -58.54 | 4.14E-32 |
| OR5P2           | -2.41 | 4.42E-04 | -6.33  | 1.40E-06 |        | NS       |
| PCDH18          | -2.29 | 6.78E-06 |        | NS       | -2.68  | 2.89E-14 |
| <b>PDK4</b>     | -2.53 | 1.90E-03 | -3.74  | 0.006427 | -15.78 | 4.50E-36 |
| PI15            | -2.07 | 1.23E-04 | -17.34 | 0.000186 |        | NS       |
| PIGR            | -3.19 | 5.37E-07 | -5.45  | 7.03E-05 |        | NS       |
| PIK3R1          | -2.03 | 7.37E-05 | -2.41  | 0.000102 |        | NS       |
| PIP *           | -8.96 | 1.08E-06 | -62.8  | 5.64E-07 |        | NS       |
| <b>PRDX1</b>    | 2     | 2.67E-05 | 1.92   | 0.001102 | 1.91   | 8.91E-14 |
| <b>PRR11 ^</b>  | 2.3   | 1.58E-06 | 9.5    | 1.28E-08 | 2.52   | 2.88E-17 |
| <b>RAD51AP1</b> | 2.2   | 7.80E-06 | 4.3    | 0.00132  | 4.44   | 1.47E-29 |
| RBM34           | 2.21  | 7.94E-07 |        | NS       |        | NS       |
| <b>RBMS3</b>    | -2.17 | 3.32E-07 | -2.82  | 0.00085  | -5.25  | 2.31E-35 |
| RGS1            | 2.2   | 1.13E-04 |        | NS       |        | NS       |
| S100A9          | 2.76  | 9.01E-04 |        | NS       |        | NS       |
| SCGB1D2 ^       | -4.04 | 1.19E-05 |        | NOA      | -7.04  | 4.25E-16 |
| SCGB2A2 *       | -5.05 | 4.01E-05 | -39.28 | 1.47E-06 |        | NS       |
| SKA3            | 2     | 8.80E-06 | 4.47   | 0.000656 |        | NOA      |
| SKIL            | 2.02  | 9.45E-05 |        | NS       | 2.79   | 1.38E-24 |
| <b>SLC7A5 *</b> | 2.09  | 2.09E-03 | 2.25   | 0.000817 | 3.96   | 2.13E-32 |

|                                       |                  |       |          |        |          |       |          |
|---------------------------------------|------------------|-------|----------|--------|----------|-------|----------|
|                                       | <b>SMC4</b>      | 2.01  | 1.56E-05 | 2.7    | 7.86E-05 | 3.15  | 1.08E-37 |
|                                       | <b>SNRPD1 ^</b>  | 2.06  | 1.18E-04 | 2.39   | 0.000965 | 1.91  | 2.42E-26 |
|                                       | <b>SPARCL1 *</b> | -2.65 | 9.09E-06 | -1.93  | 0.001856 | -2.16 | 2.33E-13 |
|                                       | <b>SPP1</b>      | 3.4   | 2.30E-06 | 11.48  | 4.91E-06 | 6.68  | 2.97E-12 |
|                                       | SRP9             | 2.11  | 4.66E-04 |        | NS       |       | NS       |
|                                       | <b>STIL</b>      | 2.14  | 7.21E-06 | 4.23   | 9.29E-05 | 9.28  | 1.33E-38 |
|                                       | STK38L ^         | 2.25  | 3.86E-06 |        | NS       | 1.89  | 1.87E-13 |
|                                       | <b>SULF1</b>     | 3.38  | 7.50E-08 | 5.76   | 2.21E-07 | 2.95  | 9.23E-24 |
|                                       | SYNGR2           | 2.02  | 7.77E-04 |        | NS       |       | NS       |
|                                       | <b>TAT</b>       | -2.27 | 6.83E-06 | -60.22 | 2.49E-09 | -3.68 | 3.73E-15 |
|                                       | <b>TBC1D9 *</b>  | -2.25 | 1.37E-07 | -4.12  | 2.21E-07 | -7.35 | 7.69E-50 |
|                                       | TFRC             | 2.06  | 2.14E-05 |        | NS       |       | NS       |
|                                       | TMEM144 *        | -2.04 | 5.22E-07 | -3.19  | 1.24E-06 |       | NS       |
|                                       | TMEM65 ^         | 2.79  | 7.64E-05 |        | NS       | 3.90  | 3.17E-30 |
|                                       | TMSB10           | 3.31  | 1.09E-08 | 2.54   | 0.000969 |       | NS       |
|                                       | TMSB15A          | 2.48  | 8.05E-04 |        | NS       |       | NOA      |
|                                       | <b>TOP2A</b>     | 4.13  | 6.26E-08 | 15.44  | 4.91E-10 | 8.58  | 4.63E-44 |
|                                       | <b>TPX2</b>      | 3.57  | 6.46E-08 | 11.83  | 2.71E-09 | 11.10 | 2.56E-63 |
|                                       | <b>TSHZ2</b>     | -2.28 | 2.10E-06 | -4.92  | 3.56E-05 | -3.71 | 3.89E-20 |
|                                       | <b>UBE2C</b>     | 2.22  | 1.53E-07 | 2.6    | 0.000417 | 19.93 | 8.26E-57 |
|                                       | <b>UBE2T</b>     | 2.18  | 2.82E-05 | 8.55   | 1.24E-07 | 6.22  | 5.05E-47 |
| <b>Non-protein coding transcripts</b> | GNG5P2           | 2.52  | 2.18E-04 |        | NOA      |       | NOA      |
|                                       | KCNQ5-IT1        | 2.16  | 4.06E-04 |        | NOA      |       | NOA      |
|                                       | LINC00357        | -2.18 | 1.52E-03 |        | NOA      |       | NOA      |
|                                       | LOC100132529     | -3.49 | 4.19E-08 |        | NOA      |       | NOA      |
|                                       | LOC100287562     | -2.19 | 1.39E-05 |        | NOA      |       | NOA      |
|                                       | LOC100506980     | 2.68  | 1.24E-04 |        | NOA      |       | NOA      |
|                                       | LOC100653008     | -2.71 | 7.06E-05 |        | NOA      |       | NOA      |
|                                       | LOC100653151     | 2.93  | 1.19E-03 |        | NOA      |       | NOA      |
|                                       | LOC727896        | 2.03  | 6.69E-04 |        | NOA      |       | NOA      |
|                                       | <b>MEG3 *</b>    | -2.53 | 6.64E-09 | -1.66  | 0.003507 | -3.39 | 3.52E-68 |
|                                       | MIR21            | -2.07 | 6.26E-04 | -6.45  | 9.40E-06 |       | NOA      |
|                                       | MIR320D1         | -2.78 | 9.67E-04 |        | NOA      |       | NOA      |
|                                       | MIR558           | 2.01  | 1.47E-03 |        | NOA      |       | NOA      |
|                                       | MIR99A           | -2.22 | 1.41E-06 | -1.62  | 6.37E-06 |       | NOA      |
|                                       | MME-AS1          | -2.67 | 1.09E-06 |        | NOA      |       | NOA      |
|                                       | RN5S303          | -2.01 | 2.64E-04 |        | NS       |       | NOA      |
|                                       | RNU2-5P          | -2.25 | 8.23E-05 |        | NS       |       | NOA      |
|                                       | RNU4-4P          | 2.35  | 1.54E-05 |        | NS       |       | NOA      |
|                                       | RNU5A-8P         | 3.39  | 1.29E-04 |        | NS       |       | NOA      |
|                                       | RNU5E-1          | 2.32  | 1.09E-03 |        | NOA      |       | NOA      |

|             |       |          |        |          |  |     |
|-------------|-------|----------|--------|----------|--|-----|
| SCARNA9L    | 2.34  | 7.39E-04 |        | NS       |  | NOA |
| SNORA11     | -2.12 | 3.53E-04 |        | NOA      |  | NOA |
| SNORA71D    | 2.36  | 1.31E-03 |        | NS       |  | NOA |
| SNORD113-2  | -4.2  | 1.48E-07 |        | NOA      |  | NOA |
| SNORD113-3  | -3.64 | 4.06E-08 | -4.56  | 2.98E-05 |  | NOA |
| SNORD114-1  | -5.22 | 3.99E-05 |        | NOA      |  | NOA |
| SNORD114-11 | -2.18 | 1.12E-04 |        | NOA      |  | NOA |
| SNORD114-15 | -2.14 | 9.23E-08 |        | NOA      |  | NOA |
| SNORD114-19 | -3.35 | 2.50E-06 |        | NOA      |  | NOA |
| SNORD114-2  | -5.2  | 2.54E-09 | -5.93  | 6.86E-08 |  | NOA |
| SNORD114-21 | -2.24 | 7.04E-06 |        | NOA      |  | NOA |
| SNORD114-25 | -2.64 | 4.34E-09 |        | NOA      |  | NOA |
| SNORD114-28 | -2.03 | 6.52E-06 |        | NOA      |  | NOA |
| SNORD114-3  | -3.85 | 5.71E-10 | -1.86  | 0.000129 |  | NOA |
| SNORD114-7  | -3.26 | 4.29E-07 |        | NOA      |  | NOA |
| SNORD116-1  | -3.13 | 5.43E-04 | -2.92  | 9.75E-05 |  | NOA |
| SNORD116-15 | -2.18 | 1.07E-03 | -2.9   | 3.47E-09 |  | NOA |
| SNORD116-17 | -2.83 | 6.91E-04 |        | NOA      |  | NOA |
| SNORD116-2  | -3.52 | 1.89E-04 |        | NS       |  | NOA |
| SNORD116-20 | -2.01 | 1.99E-03 |        | NOA      |  | NOA |
| SNORD116-24 | -4.11 | 4.93E-04 | -2.69  | 1.05E-05 |  | NOA |
| SNORD116-3  | -3.44 | 2.13E-04 | -10.47 | 1.27E-06 |  | NOA |
| SNORD116-5  | -3.05 | 1.07E-03 | -8.73  | 4.85E-07 |  | NOA |
| SNORD116-6  | -3.47 | 1.70E-04 | -6.94  | 6.70E-06 |  | NOA |
| SNORD116-8  | -3.52 | 1.42E-04 | -11.37 | 1.43E-06 |  | NOA |
| SNORD3A     | 2.57  | 5.67E-06 |        | NS       |  | NOA |
| SNORD3B-1   | 2.6   | 4.83E-06 |        | NOA      |  | NOA |
| SNORD3C     | 2.22  | 1.41E-04 |        | NOA      |  | NOA |
| SNORD41     | 2.3   | 1.56E-03 |        | NS       |  | NOA |
| SNORD78     | 5.37  | 2.97E-04 |        | NS       |  | NOA |
| TSIX        | -2.38 | 2.09E-05 |        | NS       |  | NOA |

**Supplementary Table 3:** Results from IPA Core Analysis of 185 significant genes (IDC vs NAT).

|                                               | Gene/disease/function                                                                                    | p-value             | # Molecules | Consistency score |
|-----------------------------------------------|----------------------------------------------------------------------------------------------------------|---------------------|-------------|-------------------|
| Upstream regulators                           | PTGER2                                                                                                   | 1.33E-16            |             |                   |
|                                               | ERBB2                                                                                                    | 6.21E-16            |             |                   |
|                                               | E2F4                                                                                                     | 3.58E-13            |             |                   |
|                                               | TGFB1                                                                                                    | 3.34E-12            |             |                   |
| Diseases and disorders                        | Cancer                                                                                                   | 2.61E-14 - 6.83E-04 | 119         |                   |
|                                               | Organismal Injury and Abnormalities                                                                      | 2.69E-14 - 5.11E-04 | 88          |                   |
|                                               | Reproductive System Disease                                                                              | 2.69E-14 - 5.11E-04 | 82          |                   |
| Molecular and Cellular Functions              | Cell-to-Cell Signaling and Interaction                                                                   | 1.27E-12 - 5.69E-04 | 38          |                   |
|                                               | Cell Cycle                                                                                               | 1.80E-11 - 6.83E-04 | 42          |                   |
|                                               | Cellular Movement                                                                                        | 3.04E-11 - 6.83E-04 | 51          |                   |
|                                               | Cell Morphology                                                                                          | 3.58E-09 - 4.56E-04 | 49          |                   |
|                                               | Cellular Development                                                                                     | 7.68E-09 - 6.83E-04 | 60          |                   |
| Physiological System Development and Function | Cell-mediated Immune Response                                                                            | 1.46E-08 - 4.44E-04 | 10          |                   |
|                                               | Immune Cell Trafficking                                                                                  | 1.46E-08 - 5.69E-04 | 27          |                   |
|                                               | Tissue Morphology                                                                                        | 4.43E-08 - 5.23E-04 | 41          |                   |
|                                               | Tissue Development                                                                                       | 1.05E-07 - 5.00E-04 | 56          |                   |
| Top Regulator Effect Networks                 | ADIPOQ, DOCK8, IL10, NR3C1, Tnf (family): cell death of liver cells (+4 more)                            |                     |             | 16.364            |
|                                               | ADIPOQ, HGF, NR3C1: development of epithelial tissue                                                     |                     |             | 2.846             |
|                                               | ADIPOQ: differentiation of cells                                                                         |                     |             | -5.307            |
| Top Networks                                  | Cancer, Gastrointestinal Disease, Hepatic System Disease                                                 |                     |             | 55                |
|                                               | Cell-To-Cell Signaling and Interaction, Cellular Movement, Hematological System Development and Function |                     |             | 26                |
|                                               | Cell Death and Survival, Hematological System Development and Function, Hematopoiesis                    |                     |             | 24                |
|                                               | Infectious Disease, Carbohydrate Metabolism, Molecular Transport                                         |                     |             | 24                |
|                                               | Cellular Development, Cellular Growth and Proliferation, Connective Tissue Development and Function      |                     |             | 23                |



# of molecules shows the number of molecules in the pathway that are from our list of 185 significant genes

A Consistency Score: higher scores mean networks are directionally consistent, meaning that most of the paths from regulator to target to disease/ function are consistent with the predicted state of the regulator, the observed direction of expression of the target in the dataset and the expected impact on the disease/function downstream, based on findings from the literature.

**Supplementary Table 4:** Clinical information of samples in the validation cohort

| Sample identifier | Age at diagnosis | Grade | ER status | PR status | HER2 status | Tissue sample |
|-------------------|------------------|-------|-----------|-----------|-------------|---------------|
| 1                 | 42               | 3     | Positive  | Negative  | Positive    | IDC           |
| 2                 | 31               | 3     | Positive  | Positive  | Negative    | IDC           |
| 3                 | 61               | 3     | Positive  | Positive  | Negative    | IDC           |
| 4                 | 83               | 2     | Positive  | Positive  | Positive    | IDC           |
| 5                 | 41               | 3     | Positive  | Positive  | Negative    | IDC           |
| 6                 | 46               | 1     | Positive  | Positive  | Negative    | IDC           |
| 7                 | 51               | 3     | Positive  | Positive  | Negative    | IDC           |
| 8                 | 45               | 3     | Positive  | Positive  | Negative    | IDC           |
| 9                 | 46               | 3     | Positive  | Positive  | Negative    | IDC           |
|                   |                  | None  | None      | None      | None        | NAT           |
| 10                | 63               | 1     | Positive  | Positive  | Negative    | IDC           |
| 11                | 69               | 3     | Positive  | Positive  | Negative    | IDC           |
| 12                | 65               | 3     | Negative  | Negative  | Negative    | IDC           |
| 13                | 42               | 2     | Positive  | Positive  | Negative    | IDC           |
| 14                | 60               | 3     | Negative  | Negative  | Positive    | IDC           |
| 15                | 38               | 3     | Positive  | Positive  | Negative    | IDC           |
| 16                | 42               | 3     | Positive  | Positive  | Negative    | IDC           |
| 17                | 29               | 3     | Positive  | Positive  | Positive    | IDC           |
| 18                | 40               | 3     | Positive  | Positive  | Negative    | IDC           |
| 19                | 53               | 1     | Positive  | Positive  | Negative    | IDC           |
| 20                | 64               | 1     | Positive  | Positive  | Negative    | IDC           |
| 21                | 57               | 3     | Positive  | Negative  | Positive    | IDC           |
| 22                | 71               | 3     | Negative  | Negative  | Negative    | IDC           |
| 23                | 65               | 3     | Negative  | Negative  | Positive    | IDC           |
| 24                | 78               | 3     | Negative  | Negative  | Negative    | IDC           |
| 25                | 56               | 2     | Positive  | Positive  | Negative    | IDC           |
| 26                | 59               | 2     | Positive  | Positive  | Negative    | IDC           |
| 27                | 59               | 1     | Positive  | Positive  | Negative    | IDC           |
| 28                | 78               | 1     | Positive  | Positive  | Negative    | IDC           |
| 29                | 82               | 3     | Negative  | Negative  | Negative    | IDC           |
| 30                | 72               | 3     | Positive  | Positive  | Negative    | IDC           |
| 31                | 54               | 3     | Negative  | Negative  | Positive    | IDC           |
| 32                | 80               | 1     | Positive  | Positive  | Negative    | IDC           |
| 33                | 51               | 3     | Negative  | Negative  | Negative    | IDC           |
| 34                | 90               | 3     | Positive  | Positive  | Negative    | IDC           |
| 35                | 78               | 3     | Negative  | Negative  | Positive    | IDC           |
| 36                | 73               | 3     | Positive  | Negative  | Positive    | IDC           |
| 37                | 74               | 3     | Negative  | Negative  | Negative    | IDC           |
| 38                | 50               | 3     | Negative  | Negative  | Negative    | IDC           |
| 39                | 48               | 3     | Negative  | Negative  | Negative    | IDC           |

|    |    |      |          |          |          |     |
|----|----|------|----------|----------|----------|-----|
| 40 | 58 | 3    | Negative | Negative | Negative | IDC |
| 41 | 65 | 3    | Positive | Positive | Negative | IDC |
| 42 | 50 | 3    | Negative | Negative | Negative | IDC |
| 43 | 44 | 3    | Positive | Negative | Negative | IDC |
| 44 | 44 | 1    | Positive | Positive | Negative | IDC |
| 45 | 45 | 3    | Negative | Negative | Negative | IDC |
| 46 | 36 | 3    | Negative | Negative | Positive | IDC |
| 47 | 52 | 3    | Positive | Positive | Negative | IDC |
| 48 | 53 | 3    | Negative | Negative | Positive | IDC |
|    |    | None | None     | None     | None     | NAT |
| 49 | 78 | 2    | Positive | Positive | Negative | IDC |
| 50 | 51 | 3    | Negative | Negative | Positive | IDC |
| 51 | 44 | 1    | Positive | Positive | Negative | IDC |
|    |    | None | None     | None     | None     | NAT |
| 52 | 34 | 3    | Negative | Negative | Negative | IDC |
| 53 | 75 | 3    | Negative | Negative | Negative | IDC |
| 54 | 68 | 3    | Negative | Negative | Positive | IDC |
| 55 | 62 | 3    | Negative | Negative | Negative | IDC |
| 56 | 49 | 2    | Positive | Positive | Negative | IDC |
| 57 | 75 | 3    | Negative | Negative | Positive | IDC |
| 58 | 61 | 3    | Negative | Negative | Positive | IDC |
| 59 | 48 | 3    | Negative | Negative | Negative | IDC |
| 60 | 63 | 1    | Positive | Positive | Negative | IDC |
| 61 | 46 | 3    | Negative | Negative | Negative | IDC |
| 62 | 66 | 1    | Positive | Positive | Negative | IDC |
|    |    | None | None     | None     | None     | NAT |
| 63 | 52 | 3    | Positive | Positive | Positive | IDC |
| 64 | 41 | 3    | Positive | Positive | Negative | IDC |

**Supplementary Table 5:** Fold changes and p-values of 83 significantly altered genes in lymph node positive primary tumours and lymph node metastasis. Transcripts with grey background are non-protein coding transcripts all others are protein coding transcripts.

| Transcript ID | Fold-Change(IDC+ vs. NAT+) | p-value(IDC+ vs. NAT+) | Fold-Change(LNmet vs. NAT+) | p-value(LNmet vs. NAT+) |
|---------------|----------------------------|------------------------|-----------------------------|-------------------------|
| AADA2L2       | -2.12                      | 1.54E-05               | -2.24                       | 7.11E-06                |
| ABRACL        | 2.38                       | 1.23E-05               | 2.40                        | 1.64E-05                |
| ACTR2         | 1.94                       | 1.54E-05               | 1.82                        | 0.000112                |
| ADH1B         | -2.24                      | 0.000331               | -2.37                       | 0.000193                |
| AGR3          | -3.31                      | 1.92E-10               | -2.87                       | 1.44E-08                |
| AMIGO2        | -1.68                      | 0.000167               | -1.77                       | 6.19E-05                |
| ANLN          | 2.77                       | 0.000103               | 2.77                        | 0.000153                |
| APOD          | -6.62                      | 3.03E-05               | -9.46                       | 2.33E-06                |
| ARL6IP1       | 1.93                       | 8.71E-05               | 1.87                        | 0.000259                |
| BUB1          | 1.90                       | 0.000162               | 1.98                        | 9.93E-05                |
| C5orf4        | -1.75                      | 0.00013                | -1.95                       | 1.27E-05                |
| C7orf63       | -1.53                      | 0.000255               | -1.75                       | 6.03E-06                |
| CCL14-CCL15   | -1.68                      | 1.37E-05               | -1.54                       | 0.000265                |
| CCT3          | 2.44                       | 2.01E-05               | 2.13                        | 0.000316                |
| CD34          | -1.94                      | 0.000179               | -2.20                       | 2.10E-05                |
| CD36          | -2.67                      | 7.37E-07               | -2.57                       | 2.77E-06                |
| CDCA2         | 1.85                       | 0.000332               | 1.90                        | 0.000302                |
| CENPF         | 2.87                       | 1.26E-05               | 2.39                        | 0.000315                |
| CENPI         | 1.73                       | 0.000356               | 1.86                        | 9.66E-05                |
| CHML          | 2.42                       | 0.000165               | 2.38                        | 0.000305                |
| CKS2          | 4.85                       | 1.09E-06               | 4.00                        | 1.92E-05                |
| DES12         | 2.20                       | 1.23E-05               | 1.97                        | 0.000193                |
| DHX9          | 1.82                       | 4.12E-06               | 1.79                        | 1.21E-05                |
| DNA2          | 1.90                       | 0.000323               | 2.42                        | 3.41E-06                |
| EGR1          | -2.85                      | 0.000158               | -3.27                       | 4.06E-05                |
| EMCN          | -1.56                      | 0.000295               | -1.88                       | 1.90E-06                |
| FABP4         | -3.63                      | 1.01E-05               | -3.42                       | 3.43E-05                |
| FAM96A        | 1.78                       | 7.16E-05               | 1.69                        | 0.000349                |
| FHL1          | -1.65                      | 7.65E-05               | -1.59                       | 0.000329                |
| GNG5P2        | 3.30                       | 5.21E-05               | 3.21                        | 0.000108                |
| GPC3          | -1.64                      | 0.000362               | -1.73                       | 0.000155                |
| GREB1         | -1.56                      | 0.000116               | -1.57                       | 0.000129                |
| HIST1H2AE     | 2.82                       | 0.000157               | 3.06                        | 7.70E-05                |
| HIST1H3F      | 3.67                       | 0.000791               | 4.54                        | 0.000174                |
| HIST2H2AB     | 3.42                       | 3.06E-05               | 3.65                        | 2.06E-05                |
| IGSF10        | -1.90                      | 0.000717               | -2.26                       | 4.52E-05                |
| IL20RA        | -1.62                      | 4.27E-05               | -1.70                       | 1.49E-05                |
| ITI5          | -1.60                      | 0.000356               | -1.78                       | 3.16E-05                |
| ITM2A         | -1.72                      | 0.000428               | -1.95                       | 3.85E-05                |

|             |       |          |       |          |
|-------------|-------|----------|-------|----------|
| JAM2        | -2.00 | 3.76E-06 | -2.22 | 3.96E-07 |
| KCNK1       | 1.71  | 5.16E-05 | 1.65  | 0.000187 |
| KIF11       | 2.32  | 0.000251 | 2.32  | 0.000341 |
| KLHDC1      | -1.88 | 5.82E-05 | -1.84 | 0.000139 |
| KPNA2       | 2.31  | 0.00068  | 2.53  | 0.000264 |
| LEP         | -3.34 | 2.14E-06 | -2.95 | 2.38E-05 |
| LIFR        | -2.80 | 3.00E-06 | -2.43 | 5.93E-05 |
| LOC201651   | -1.77 | 1.27E-05 | -1.88 | 3.42E-06 |
| LOC284825   | -1.77 | 2.34E-05 | -1.66 | 0.000184 |
| LRRC17      | -1.54 | 0.000405 | -1.67 | 6.38E-05 |
| MAD2L1      | 1.83  | 0.000124 | 1.90  | 8.02E-05 |
| MAZ         | 1.52  | 1.89E-05 | 1.59  | 5.13E-06 |
| MEG3        | -2.65 | 3.68E-08 | -2.80 | 1.79E-08 |
| MIR3689F    | -1.65 | 0.000533 | -1.75 | 0.000178 |
| MIR3911     | -2.26 | 0.000878 | -2.57 | 0.000199 |
| MIR497HG    | -1.80 | 6.41E-06 | -1.68 | 6.55E-05 |
| MME         | -2.00 | 0.00057  | -3.06 | 3.65E-07 |
| MME-AS1     | -2.82 | 3.98E-06 | -3.24 | 5.81E-07 |
| MMP16       | -1.51 | 0.000204 | -1.57 | 9.02E-05 |
| MRPL47      | 2.02  | 4.12E-05 | 2.00  | 8.02E-05 |
| NDC80       | 2.48  | 3.52E-05 | 2.20  | 0.000359 |
| NEK10       | -1.75 | 0.000144 | -1.87 | 4.41E-05 |
| NOVA1       | -1.67 | 1.64E-05 | -1.60 | 9.34E-05 |
| NUSAP1      | 2.14  | 3.06E-05 | 2.11  | 6.03E-05 |
| PI15        | -2.07 | 0.000681 | -2.40 | 8.56E-05 |
| PLSCR4      | -1.77 | 0.000447 | -2.06 | 2.49E-05 |
| RBMS3       | -2.08 | 5.91E-05 | -2.30 | 1.10E-05 |
| RELN        | -1.78 | 8.99E-05 | -1.80 | 0.000112 |
| RMI2        | 1.67  | 8.07E-05 | 1.63  | 0.000211 |
| RTN4RL1     | -1.50 | 0.000264 | -1.57 | 8.47E-05 |
| SMS         | 2.03  | 0.000107 | 2.00  | 0.000205 |
| SNORD114-1  | -5.90 | 0.000277 | -6.99 | 0.000117 |
| SNORD114-28 | -2.21 | 1.90E-05 | -2.04 | 0.000142 |
| SPRY2       | -1.58 | 0.000249 | -1.60 | 0.000263 |
| STAT1       | 2.12  | 3.67E-05 | 2.12  | 5.55E-05 |
| SVEP1       | -1.88 | 7.05E-06 | -1.87 | 1.43E-05 |
| TMSB10      | 4.48  | 1.82E-09 | 3.96  | 3.57E-08 |
| TNFSF13B    | 1.84  | 3.73E-05 | 1.95  | 1.20E-05 |
| TOMM20      | 2.03  | 5.65E-05 | 1.95  | 0.000174 |
| TOP2A       | 5.08  | 5.08E-07 | 4.63  | 2.88E-06 |
| TPX2        | 3.40  | 2.48E-05 | 3.17  | 9.17E-05 |
| TSHZ2       | -2.14 | 0.000131 | -2.33 | 3.94E-05 |
| TTC6        | -1.95 | 2.13E-07 | -1.72 | 2.17E-05 |
| UBE2C       | 2.01  | 0.000275 | 2.08  | 0.000215 |

**Supplementary Table 6:** Results from IPA Core Analysis of 83 genes associated with lymph node metastases.

|                                               | Gene/disease/function                                                                      | p-value             | # Molecules | Consistency score |
|-----------------------------------------------|--------------------------------------------------------------------------------------------|---------------------|-------------|-------------------|
| Upstream regulators                           | E2F4                                                                                       | 3.58E-08            |             |                   |
|                                               | CDKN1A                                                                                     | 3.72E-08            |             |                   |
|                                               | ERBB2                                                                                      | 8.08E-08            |             |                   |
| Diseases and disorders                        | Cancer                                                                                     | 2.90E-09 - 1.08E-02 | 62          |                   |
|                                               | Organismal Injury and Abnormalities                                                        | 2.90E-09 - 1.08E-02 | 41          |                   |
|                                               | Reproductive System Disease                                                                | 2.90E-09 - 1.08E-02 | 40          |                   |
| Molecular and Cellular Functions              | Cell Cycle                                                                                 | 6.00E-12 - 1.08E-02 | 22          |                   |
|                                               | Cellular Assembly and Organization                                                         | 6.13E-08 - 1.08E-02 | 20          |                   |
|                                               | DNA Replication, Recombination, and Repair                                                 | 6.13E-08 - 1.08E-02 | 16          |                   |
|                                               | Cell Death and Survival                                                                    | 1.12E-04 - 1.08E-02 | 26          |                   |
|                                               | Cellular Function and Maintenance                                                          | 2.26E-04 - 1.08E-02 | 14          |                   |
| Physiological System Development and Function | Reproductive System Development and Function                                               | 7.63E-05 - 7.19E-03 | 5           |                   |
|                                               | Embryonic Development                                                                      | 5.32E-04 - 1.08E-02 | 12          |                   |
|                                               | Tissue Development                                                                         | 3.72E-04 - 1.08E-02 | 16          |                   |
| Top Networks                                  | Cell Cycle, Cellular Assembly and Organization, DNA Replication, Recombination, and Repair |                     |             | 41                |
|                                               | Cell Cycle, Humoral Immune Response, Cellular Movement                                     |                     |             | 39                |
|                                               | Developmental Disorder, Hereditary Disorder, Neurological Disease                          |                     |             | 36                |
|                                               | Cellular Development, Cellular Growth and Proliferation, Cancer                            |                     |             | 26                |
|                                               | Cell Cycle, Cardiovascular System Development and Function, Cellular Movement              |                     |             | 4                 |

# of molecules shows the number of molecules in the pathway that are from our list of 185 significant genes

A Consistency Score: higher scores mean networks are directionally consistent, meaning that most of the paths from regulator to target to disease/ function are consistent with the predicted state of the regulator, the observed direction of expression of the target in the dataset and the expected impact on the disease/function downstream, based on findings from the literature.

**Supplementary Table 7:** 22 microRNAs significantly altered in IDC+ and LNmets samples but not in IDC-samples.

| Probeset ID     | Fold-Change(IDC LN+ vs. NAT LN+) | p-value(IDC LN+ vs. NAT LN+) | Fold-Change(LN vs. NAT LN+) | p-value(LN vs. NAT LN+) |
|-----------------|----------------------------------|------------------------------|-----------------------------|-------------------------|
| hsa-let-7a      | -2.05                            | 6.49E-07                     | -2.37                       | 3.24E-08                |
| hsa-miR-100     | -2.67                            | 9.94E-05                     | -2.11                       | 4.05E-03                |
| hsa-miR-101     | -1.62                            | 2.02E-03                     | -1.67                       | 1.67E-03                |
| hsa-miR-125b-2* | -1.61                            | 1.60E-09                     | -1.74                       | 7.54E-11                |
| hsa-miR-1274a   | 1.99                             | 4.93E-04                     | 2.44                        | 2.76E-05                |
| hsa-miR-1274b   | 1.75                             | 6.43E-03                     | 2.48                        | 5.00E-05                |
| hsa-miR-1280    | 1.95                             | 3.52E-05                     | 2.02                        | 3.45E-05                |
| hsa-miR-1308    | 2.97                             | 5.47E-06                     | 2.88                        | 2.24E-05                |
| hsa-miR-130a    | -2.30                            | 7.94E-04                     | -2.50                       | 4.77E-04                |
| hsa-miR-132     | -1.83                            | 2.82E-07                     | -1.85                       | 7.47E-07                |
| hsa-miR-145*    | -1.58                            | 5.56E-06                     | -1.59                       | 1.07E-05                |
| hsa-miR-204     | -1.81                            | 1.38E-08                     | -1.76                       | 1.83E-07                |
| hsa-miR-205     | -3.21                            | 4.10E-03                     | -6.74                       | 1.89E-05                |
| hsa-miR-218     | -1.63                            | 7.80E-06                     | -1.60                       | 3.82E-05                |
| hsa-miR-26a     | -1.91                            | 2.89E-05                     | -2.12                       | 5.18E-06                |
| hsa-miR-26b     | -1.67                            | 2.48E-04                     | -1.64                       | 7.09E-04                |
| hsa-miR-299-5p  | -1.82                            | 1.33E-07                     | -1.82                       | 5.02E-07                |
| hsa-miR-337-5p  | -1.73                            | 5.90E-09                     | -1.87                       | 4.78E-10                |
| hsa-miR-34a     | -1.64                            | 4.12E-03                     | -1.97                       | 2.42E-04                |
| hsa-miR-379     | -1.79                            | 8.28E-11                     | -1.98                       | 2.34E-12                |
| hsa-miR-381     | -1.51                            | 1.52E-07                     | -1.64                       | 5.41E-09                |
| hsa-miR-663     | 1.80                             | 8.16E-03                     | 2.16                        | 1.18E-03                |

**Supplementary Table 8:** Correlation of significant genes and microRNAs.

The expression values of significantly altered genes and microRNAs in lymph node positive tumours and lymph node metastases have been correlated to identify potential microRNA targets in the list of genes, using Partek Genomic Suite 6.6. The integration is based on two prediction software suites (TargetScan 6.2 and microcosm) as well as the expression values of the microRNAs and genes. Genes written in bold are predicted in both prediction software suites.

|                   | Gene Symbol  | MicroRNA Name  | Pearson correlation coefficient | p-value(Pearson correlation) | Spearman's rank correlation coefficient | p-value(Spearman's rank correlation) |
|-------------------|--------------|----------------|---------------------------------|------------------------------|-----------------------------------------|--------------------------------------|
| targetscan<br>6.2 | ARL6IP1      | hsa-miR-130a   | -0.216                          | 8.95E-02                     | -0.257                                  | 4.24E-02                             |
|                   | <b>CENPF</b> | hsa-miR-205    | -0.383                          | 1.97E-03                     | -0.464                                  | 1.28E-04                             |
|                   | <b>CKS2</b>  | hsa-miR-26a    | -0.536                          | 5.99E-06                     | -0.582                                  | 5.66E-07                             |
|                   |              | hsa-miR-26b    | -0.533                          | 6.84E-06                     | -0.585                                  | 4.86E-07                             |
|                   | DNA2         | hsa-miR-26b    | -0.590                          | 3.64E-07                     | -0.625                                  | 4.46E-08                             |
|                   |              | hsa-miR-26a    | -0.550                          | 3.00E-06                     | -0.587                                  | 4.30E-07                             |
|                   |              | hsa-let-7a     | -0.513                          | 1.73E-05                     | -0.471                                  | 9.60E-05                             |
|                   | EGR1         | hsa-miR-132    | 0.580                           | 6.21E-07                     | 0.531                                   | 7.56E-06                             |
|                   | <b>GPC3</b>  | hsa-miR-204    | 0.446                           | 2.49E-04                     | 0.382                                   | 2.03E-03                             |
|                   | GREB1        | hsa-miR-26b    | 0.231                           | 6.86E-02                     | 0.262                                   | 3.82E-02                             |
|                   |              | hsa-miR-26a    | 0.318                           | 1.11E-02                     | 0.370                                   | 2.80E-03                             |
|                   |              | hsa-let-7a     | 0.351                           | 4.85E-03                     | 0.355                                   | 4.25E-03                             |
|                   |              | hsa-miR-381    | 0.537                           | 5.61E-06                     | 0.502                                   | 2.81E-05                             |
|                   | <b>ITIH5</b> | hsa-miR-299-5p | 0.347                           | 5.35E-03                     | 0.292                                   | 2.02E-02                             |
|                   | <b>KCNK1</b> | hsa-miR-26a    | -0.349                          | 5.02E-03                     | -0.385                                  | 1.82E-03                             |
|                   |              | hsa-miR-26b    | -0.214                          | 9.29E-02                     | -0.309                                  | 1.37E-02                             |
|                   | <b>KIF11</b> | hsa-miR-101    | -0.375                          | 2.45E-03                     | -0.383                                  | 1.93E-03                             |
|                   |              | hsa-miR-381    | -0.321                          | 1.02E-02                     | -0.297                                  | 1.80E-02                             |
|                   | <b>KPNA2</b> | hsa-miR-26b    | -0.553                          | 2.55E-06                     | -0.614                                  | 8.74E-08                             |
|                   |              | hsa-miR-26a    | -0.518                          | 1.35E-05                     | -0.558                                  | 2.07E-06                             |
|                   | LIFR         | hsa-miR-218    | 0.304                           | 1.56E-02                     | 0.342                                   | 6.05E-03                             |
|                   |              | hsa-miR-101    | 0.312                           | 1.29E-02                     | 0.314                                   | 1.21E-02                             |
|                   |              | hsa-miR-26a    | 0.368                           | 3.02E-03                     | 0.409                                   | 8.83E-04                             |
|                   |              | hsa-miR-26b    | 0.424                           | 5.36E-04                     | 0.399                                   | 1.20E-03                             |
|                   | MAZ          | hsa-miR-34a    | -0.434                          | 3.76E-04                     | -0.442                                  | 2.85E-04                             |
|                   | <b>MME</b>   | hsa-miR-218    | 0.182                           | 1.55E-01                     | 0.147                                   | 2.49E-01                             |
|                   |              | hsa-miR-204    | 0.457                           | 1.64E-04                     | 0.362                                   | 3.51E-03                             |
|                   | MMP16        | hsa-miR-26b    | 0.324                           | 9.49E-03                     | 0.294                                   | 1.94E-02                             |
|                   |              | hsa-miR-26a    | 0.414                           | 7.52E-04                     | 0.394                                   | 1.38E-03                             |
|                   |              | hsa-miR-132    | 0.560                           | 1.86E-06                     | 0.379                                   | 2.16E-03                             |
|                   | NOVA1        | hsa-miR-101    | 0.371                           | 2.74E-03                     | 0.296                                   | 1.84E-02                             |



|           |         |                 |        |          |        |          |
|-----------|---------|-----------------|--------|----------|--------|----------|
|           |         | hsa-miR-132     | 0.537  | 5.59E-06 | 0.395  | 1.37E-03 |
|           |         | hsa-miR-26a     | 0.542  | 4.49E-06 | 0.495  | 3.68E-05 |
|           |         | hsa-miR-26b     | 0.545  | 3.83E-06 | 0.542  | 4.55E-06 |
|           |         | hsa-let-7a      | 0.609  | 1.20E-07 | 0.466  | 1.19E-04 |
|           |         | hsa-miR-204     | 0.626  | 4.05E-08 | 0.562  | 1.63E-06 |
|           | PI15    | hsa-miR-100     | 0.227  | 7.41E-02 | 0.176  | 1.67E-01 |
|           |         | hsa-miR-299-5p  | 0.331  | 8.01E-03 | 0.253  | 4.56E-02 |
|           |         | hsa-miR-381     | 0.369  | 2.93E-03 | 0.325  | 9.33E-03 |
|           | RELN    | hsa-miR-218     | 0.179  | 1.60E-01 | 0.170  | 1.83E-01 |
|           |         | hsa-miR-34a     | 0.358  | 3.98E-03 | 0.387  | 1.74E-03 |
|           | RTN4RL1 | hsa-miR-34a     | 0.235  | 6.34E-02 | 0.264  | 3.66E-02 |
|           | TOMM20  | hsa-miR-379     | -0.303 | 1.59E-02 | -0.373 | 2.63E-03 |
|           | TSHZ2   | hsa-miR-218     | 0.255  | 4.41E-02 | 0.262  | 3.81E-02 |
|           |         | hsa-miR-101     | 0.286  | 2.31E-02 | 0.264  | 3.69E-02 |
|           |         | hsa-miR-34a     | 0.438  | 3.25E-04 | 0.444  | 2.71E-04 |
|           |         | hsa-miR-381     | 0.589  | 3.88E-07 | 0.445  | 2.63E-04 |
|           |         | hsa-miR-132     | 0.619  | 6.42E-08 | 0.497  | 3.48E-05 |
| microcosm | AADACL2 | hsa-miR-125b-2* | 0.600  | 2.01E-07 | 0.529  | 8.25E-06 |
|           | APOD    | hsa-let-7a      | 0.493  | 4.11E-05 | 0.420  | 6.03E-04 |
|           | C5orf4  | hsa-miR-101     | 0.268  | 3.35E-02 | 0.229  | 7.11E-02 |
|           | CCT3    | hsa-miR-125b-2* | -0.435 | 3.73E-04 | -0.422 | 5.70E-04 |
|           |         | hsa-let-7a      | -0.409 | 8.69E-04 | -0.384 | 1.91E-03 |
|           |         | hsa-miR-205     | -0.251 | 4.75E-02 | -0.293 | 1.99E-02 |
|           |         | hsa-miR-130a    | -0.154 | 2.27E-01 | -0.186 | 1.45E-01 |
|           | CD34    | hsa-miR-218     | 0.403  | 1.06E-03 | 0.477  | 7.68E-05 |
|           |         | hsa-miR-337-5p  | 0.597  | 2.45E-07 | 0.534  | 6.71E-06 |
|           | CD36    | hsa-miR-26a     | 0.408  | 9.05E-04 | 0.393  | 1.46E-03 |
|           |         | hsa-miR-125b-2* | 0.605  | 1.49E-07 | 0.519  | 1.32E-05 |
|           | CDCA2   | hsa-miR-204     | -0.422 | 5.66E-04 | -0.363 | 3.47E-03 |
|           | CENPF   | hsa-miR-205     | -0.383 | 1.97E-03 | -0.464 | 1.28E-04 |
|           | CENPI   | hsa-miR-101     | -0.174 | 1.72E-01 | -0.141 | 2.71E-01 |
|           | CKS2    | hsa-miR-26a     | -0.536 | 5.99E-06 | -0.582 | 5.66E-07 |
|           |         | hsa-miR-26b     | -0.533 | 6.84E-06 | -0.585 | 4.86E-07 |
|           |         | hsa-miR-145*    | -0.385 | 1.82E-03 | -0.375 | 2.47E-03 |
|           |         | hsa-miR-130a    | -0.302 | 1.63E-02 | -0.345 | 5.63E-03 |
|           | EMCN    | hsa-miR-379     | 0.507  | 2.22E-05 | 0.524  | 1.06E-05 |
|           |         | hsa-miR-125b-2* | 0.583  | 5.22E-07 | 0.590  | 3.54E-07 |
|           | FAM96A  | hsa-miR-26a     | -0.451 | 2.11E-04 | -0.469 | 1.07E-04 |
|           |         | hsa-miR-26b     | -0.366 | 3.19E-03 | -0.459 | 1.54E-04 |
|           |         | hsa-miR-381     | -0.250 | 4.85E-02 | -0.243 | 5.48E-02 |
|           | GPC3    | hsa-miR-34a     | 0.283  | 2.48E-02 | 0.294  | 1.93E-02 |

|          |                 |        |          |        |          |
|----------|-----------------|--------|----------|--------|----------|
|          | hsa-miR-204     | 0.446  | 2.49E-04 | 0.382  | 2.03E-03 |
| HIST1H3F | hsa-miR-337-5p  | -0.515 | 1.60E-05 | -0.438 | 3.29E-04 |
|          | hsa-miR-101     | -0.454 | 1.85E-04 | -0.412 | 7.95E-04 |
|          | hsa-miR-125b-2* | -0.393 | 1.44E-03 | -0.399 | 1.18E-03 |
| IGSF10   | hsa-miR-337-5p  | 0.604  | 1.62E-07 | 0.412  | 7.96E-04 |
| ITIH5    | hsa-miR-299-5p  | 0.347  | 5.35E-03 | 0.292  | 2.02E-02 |
|          | hsa-miR-26a     | 0.417  | 6.67E-04 | 0.392  | 1.50E-03 |
|          | hsa-miR-26b     | 0.425  | 5.09E-04 | 0.416  | 7.07E-04 |
| KCNK1    | hsa-miR-100     | -0.237 | 6.11E-02 | -0.268 | 3.37E-02 |
| KIF11    | hsa-miR-101     | -0.375 | 2.45E-03 | -0.383 | 1.93E-03 |
|          | hsa-miR-381     | -0.321 | 1.02E-02 | -0.297 | 1.80E-02 |
| KLHDC1   | hsa-miR-101     | 0.466  | 1.18E-04 | 0.431  | 4.19E-04 |
| KPNA2    | hsa-miR-26b     | -0.553 | 2.55E-06 | -0.614 | 8.74E-08 |
|          | hsa-miR-26a     | -0.518 | 1.35E-05 | -0.558 | 2.07E-06 |
|          | hsa-let-7a      | -0.443 | 2.76E-04 | -0.414 | 7.45E-04 |
|          | hsa-miR-130a    | -0.142 | 2.68E-01 | -0.218 | 8.63E-02 |
| LRRC17   | hsa-let-7a      | 0.415  | 7.17E-04 | 0.307  | 1.44E-02 |
|          | hsa-miR-125b-2* | 0.474  | 8.72E-05 | 0.443  | 2.72E-04 |
| MME      | hsa-miR-26b     | 0.311  | 1.33E-02 | 0.300  | 1.70E-02 |
|          | hsa-miR-26a     | 0.335  | 7.25E-03 | 0.373  | 2.60E-03 |
|          | hsa-miR-125b-2* | 0.491  | 4.38E-05 | 0.436  | 3.56E-04 |
| MRPL47   | hsa-let-7a      | -0.376 | 2.38E-03 | -0.315 | 1.18E-02 |
| NEK10    | hsa-miR-299-5p  | 0.255  | 4.39E-02 | 0.152  | 2.33E-01 |
|          | hsa-miR-218     | 0.328  | 8.58E-03 | 0.247  | 5.06E-02 |
| RELN     | hsa-miR-218     | 0.179  | 1.60E-01 | 0.170  | 1.83E-01 |
| SVEP1    | hsa-miR-299-5p  | 0.418  | 6.60E-04 | 0.422  | 5.80E-04 |
|          | hsa-miR-26b     | 0.486  | 5.40E-05 | 0.530  | 7.96E-06 |
|          | hsa-miR-381     | 0.511  | 1.87E-05 | 0.455  | 1.79E-04 |
|          | hsa-miR-26a     | 0.536  | 6.02E-06 | 0.631  | 3.00E-08 |
|          | hsa-miR-145*    | 0.589  | 3.92E-07 | 0.566  | 1.32E-06 |
| TMSB10   | hsa-miR-100     | -0.393 | 1.45E-03 | -0.455 | 1.76E-04 |
|          | hsa-miR-299-5p  | -0.321 | 1.03E-02 | -0.308 | 1.40E-02 |
| TTC6     | hsa-miR-130a    | 0.353  | 4.53E-03 | 0.371  | 2.77E-03 |
|          | hsa-miR-337-5p  | 0.520  | 1.28E-05 | 0.391  | 1.53E-03 |
|          | hsa-miR-145*    | 0.556  | 2.24E-06 | 0.403  | 1.05E-03 |
| UBE2C    | hsa-miR-337-5p  | -0.477 | 7.72E-05 | -0.406 | 9.58E-04 |
|          | hsa-miR-379     | -0.475 | 8.29E-05 | -0.417 | 6.68E-04 |
|          | hsa-miR-381     | -0.411 | 8.09E-04 | -0.333 | 7.58E-03 |

**Table 9:** List of our miRNAs of interest that have been associated with TNBC or tumour progression previously

| microRNA | What is known about this microRNA in TNBC                                                                                                                                                      | Reference   |
|----------|------------------------------------------------------------------------------------------------------------------------------------------------------------------------------------------------|-------------|
| miR-101  | Activates Akt and estrogen-independent growth                                                                                                                                                  | 1           |
| miR-145  | Is down-regulated in TNBC<br>Is an onco-miR, targets BRCA1; effects BRCA1-mediated proliferation and homologous recombination                                                                  | 2<br>3      |
| miR-125  | Is down-regulated in TNBC and associated with chemo-resistance<br>Targets HER2                                                                                                                 | 4<br>5      |
| miR-130a | Is down-regulated in TNBC and associated with chemoresistance<br>Is a marker for HER2                                                                                                          | 4<br>6      |
| miR-205  | Is down-regulated in TNBC<br>Is a tumour-suppressor-miR; targets E2F1, LAMC1; suppresses proliferation, cell cycle and tumour growth<br>Lower levels are associated with lymph node metastasis | 2<br>7<br>8 |
| miR-34a  | Is a tumour-suppressor-miR; targets AXL; inhibits migration                                                                                                                                    | 9           |
| miR-381  | Is associated with distant free survival and prognosis                                                                                                                                         | 10          |
| let-7a   | Is down-regulated in TNBC; tumour-suppressor-miR; targets oncogenes including RAS, MYC, HMGA2                                                                                                  | 11,12       |

**Supplementary Fig. 1:** Unsupervised hierarchical clustering of 66 validated genes (common to study, second and TCGA cohort) significantly altered genes comparing IDC vs NAT samples.

Tumour vs normal comparison in our study cohort (33 IDC, 15 NAT), our second cohort (16 IDC, 4 NAT) and the TCGA TNBC cohort (55 IDC, 5 NAT) revealed 66 genes commonly differentially expressed between tumour and normal samples. A) Hierarchical clustering of 185 significantly altered genes in the TNBC study cohort. B) Hierarchical clustering of 66 significantly altered and validated genes in the TNBC study cohort. C) Hierarchical clustering of 66 significantly altered genes in our second cohort. D) Hierarchical clustering of 66 significantly altered genes in the TCGA TNBC cohort. TvN stands for the comparison of tumour vs normal samples. All normal adjacent samples (NAT) are shown in green and all primary tumour samples are shown in blue in the sample trees on the left (y-axis). Branches containing normal samples are shown in green, tumour samples in black. Genes are clustered along the x-axis. Low gene expression is shown in blue, high expression is shown in red and equivocal expression is shown in grey.

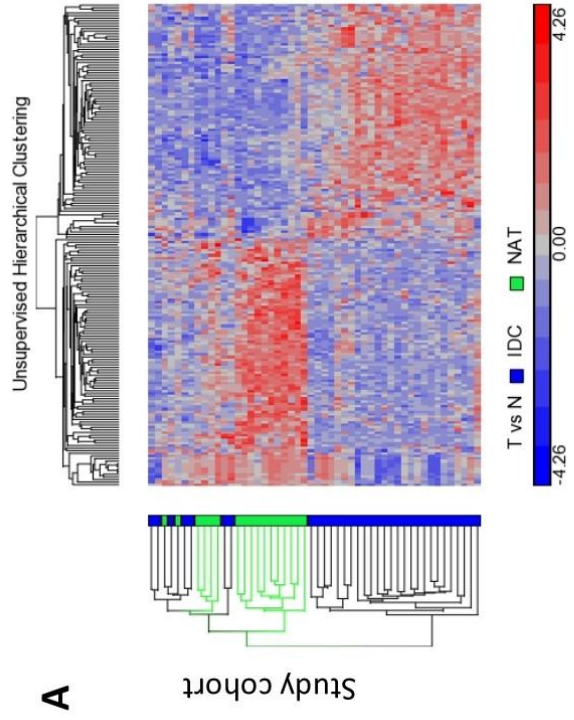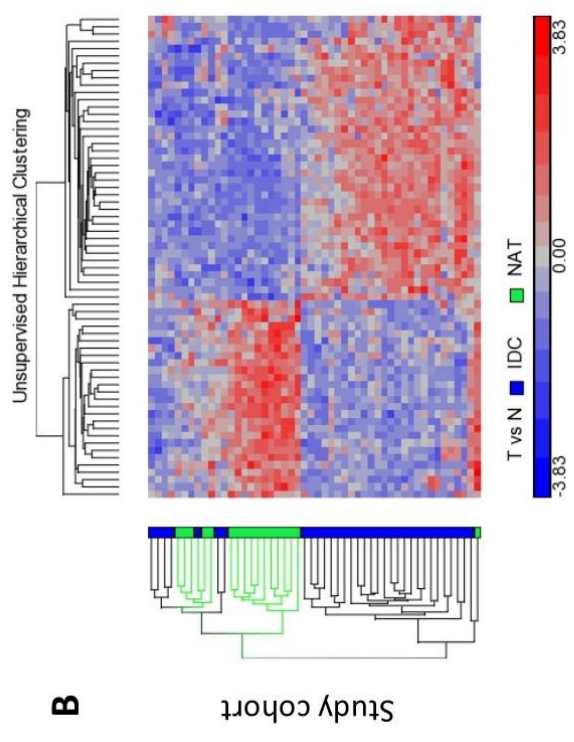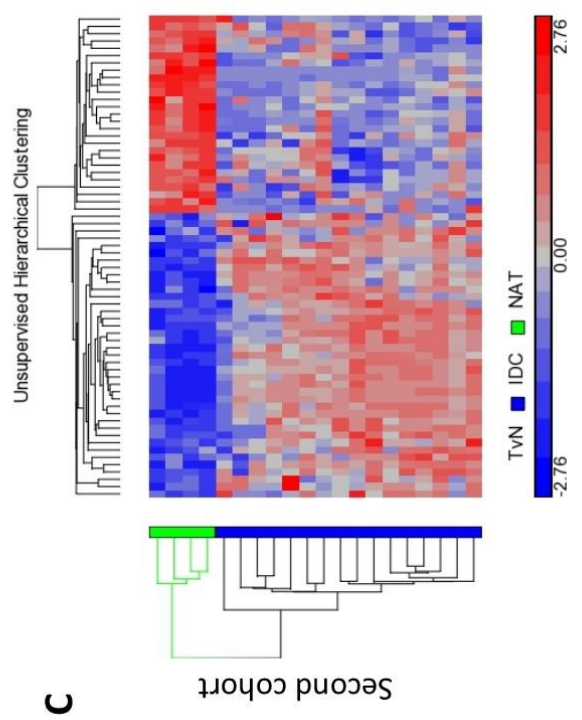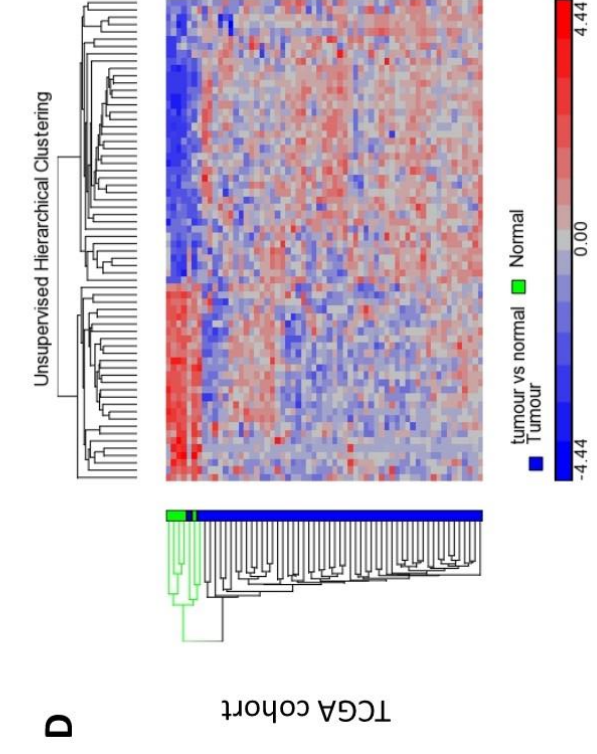

**Supplementary Figure 2:** Expression levels in TNBC samples for estrogen receptor (ER), progesterone receptor (PR), and human epidermal growth factor receptor 2 (HER2) compared to receptor positive patients. The relative gene expression of all three receptors from TNBC samples has been compared to the expression of receptor positive patients from our second cohort. All genes were normalised to beta-2-microglobulin (B2M) as a housekeeping gene. Boxes represent the median  $\pm$  interquartile range. \*\*\*\*  $p < 0.0001$ ; \*\*  $p = 0.001$  to  $0.01$ . Numbers in brackets represent the number of patients within the subgroups.

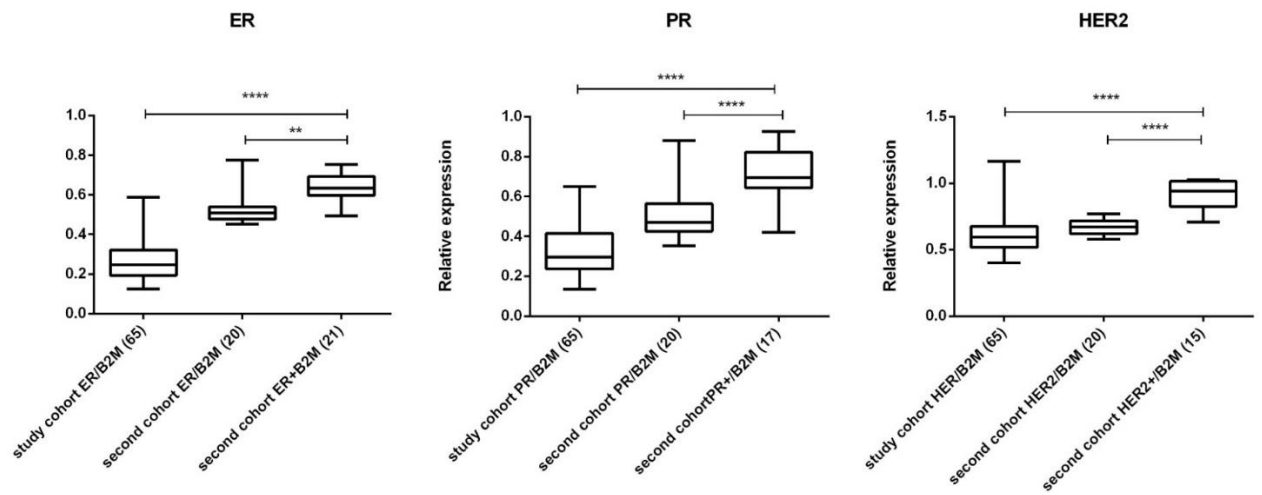

## References

1. Sachdeva, M. *et al.* MicroRNA-101-mediated Akt activation and estrogen-independent growth. *Oncogene* **30**, 822-31 (2011).
2. Sempere, L.F. *et al.* Altered MicroRNA expression confined to specific epithelial cell subpopulations in breast cancer. *Cancer Res* **67**, 11612-20 (2007).
3. Garcia, A.I. *et al.* Down-regulation of BRCA1 expression by miR-146a and miR-146b-5p in triple negative sporadic breast cancers. *EMBO Mol Med* **3**, 279-90 (2011).
4. Ouyang, M. *et al.* MicroRNA profiling implies new markers of chemoresistance of triple-negative breast cancer. *PLoS One* **9**, e96228 (2014).
5. Scott, G.K. *et al.* Coordinate suppression of ERBB2 and ERBB3 by enforced expression of micro-RNA miR-125a or miR-125b. *J Biol Chem* **282**, 1479-86 (2007).
6. Lowery, A.J. *et al.* MicroRNA signatures predict oestrogen receptor, progesterone receptor and HER2/neu receptor status in breast cancer. *Breast Cancer Res* **11**, R27 (2009).
7. Piovan, C. *et al.* Oncosuppressive role of p53-induced miR-205 in triple negative breast cancer. *Mol Oncol* **6**, 458-72 (2012).
8. Berber, U. *et al.* miR-205 and miR-200c: Predictive Micro RNAs for Lymph Node Metastasis in Triple Negative Breast Cancer. *J Breast Cancer* **17**, 143-8 (2014).
9. Mackiewicz, M. *et al.* Identification of the receptor tyrosine kinase AXL in breast cancer as a target for the human miR-34a microRNA. *Breast Cancer Res Treat* **130**, 663-79 (2011).
10. de Rinaldis, E. *et al.* Integrated genomic analysis of triple-negative breast cancers reveals novel microRNAs associated with clinical and molecular phenotypes and sheds light on the pathways they control. *BMC Genomics* **14**, 643 (2013).
11. Bussing, I., Slack, F.J. & Grosshans, H. let-7 microRNAs in development, stem cells and cancer. *Trends Mol Med* **14**, 400-9 (2008).
12. Boyerinas, B., Park, S.M., Hau, A., Murmann, A.E. & Peter, M.E. The role of let-7 in cell differentiation and cancer. *Endocr Relat Cancer* **17**, F19-36 (2010).
